# Supplementary material
Source: publisher figshare collection journal article supplement (https://gsajournals.figshare.com/ndownloader/files/22111815)
Supplement: Supplementary file 1 [file 22111815]

**Table S1. Primers used in this study**

| Primer | Sequence (5’ – 3’) |
| --- | --- |
| *For building* Pvvd::3xFLAG *tagging vector* |  |
| *VVD-3000F_EcoRI\NotI* | GGCTAGAATTCGCGGCCGCTTATTCACGCCAGCACTGTGATTC |
| *VVD-R1_XbaI* | GGCTAGTCTAGAGGTGCTGGTTATGAGACAGTGTG |
|  |  |
| qPCR |  |
|  |  |
| Actin (146bp) |  |
| 3210 | CTTCTGGCCCATACCGATCAT |
| 3216 | ATGTCGCGATAGCTTCCATC |
|  |  |
| *fkr-5* (158bp) |  |
| 5440 | GCTGCCAGGTGTCCAACTAC |
| 5441 | GAGGCTAGTAGCGACAGCGA |
|  |  |
| *csr-1* (101bp) |  |
| 5351 | TTTGGTCCCTACCCCAGACA |
| 5352 | CCATTGACGACATTGCGGAG |
|  |  |
| Cen IIIL (169bp) |  |
| 5250 | CGACTATCCGAACCGGAAGGAG |
| 5251 | CCGAATCCGGCTCAGTACAGC |
|  |  |
| 8:A6 (302bp) |  |
| 1823 | GGATGGCGGATCCTCAAAAATA |
| 1824 | TAACCGCCGCTTTTTAAAATTAGGA |
|  |  |
| 8:F10 (316bp) |  |
| 1827 | GTAACGCAAATTCTAAAATTGCAATAC |
| 1828 | CTTAGTAATTAATTTAATACGTGCGCC |
|  |  |
| Tel VIIL (208bp) |  |
| 5272 | TTCCCGTCCCTACCAGGCAT |
| 5273 | GAGCGGAGGTGGACTTTGCG |
